# Supplementary material for: Treatment and survival of patients diagnosed with high-risk HR+/HER2− breast cancer in the Netherlands: a population-based retrospective cohort study
Source: PubMed Central journal article supplement (PMC11067336; doi:10.1016/j.esmoop.2024.103008), 2024-04-26
Supplement: mmc1.pdf [file mmc1.pdf]

## **Supplementary appendix**

Supplement to: Lammers S.W.M., Meegdes M., Vriens I.J.H. et al. Treatment and survival of patients diagnosed with high-risk HR+/HER2- breast cancer in the Netherlands: a population-based retrospective cohort study.

*Corresponding author:*

Sandra M.E. Geurts, PhD

ORCID ID: 0000-0002-4265-9968

Department of Medical Oncology, Maastricht University Medical Centre,

P.O. Box: 5800, 6202 AZ Maastricht, the Netherlands

Email: [sandra.geurts@mumc.nl](mailto:sandra.geurts@mumc.nl)

Phone: +31433877025

## Table of contents

|                                                                                                                                                                                                                                                                            |    |
|----------------------------------------------------------------------------------------------------------------------------------------------------------------------------------------------------------------------------------------------------------------------------|----|
| <b>Supplementary Table 1.</b> Risk classification .....                                                                                                                                                                                                                    | 3  |
| <b>Supplementary Figure 1.</b> Flowchart of included patients .....                                                                                                                                                                                                        | 4  |
| <b>Supplementary Table 2.</b> Baseline characteristics of patients diagnosed with and surgically treated for non-metastatic invasive HR+/HER2- breast cancer in the Netherlands between 2011 and 2019 by period of diagnosis (N (%)).....                                  | 5  |
| <b>Supplementary Figure 2.</b> Number and proportion of patients diagnosed with and surgically treated for non-metastatic invasive HR+/HER2- breast cancer in the Netherlands between 2011 and 2019 according to risk profile, total and per 3-year incidence period ..... | 7  |
| <b>Supplementary Table 3.</b> Baseline characteristics of patients diagnosed with high-risk HR+/HER2- breast cancer by period of diagnosis (N (%)) .....                                                                                                                   | 8  |
| <b>Supplementary Table 4.</b> Systemic treatment choices in patients diagnosed with high-risk HR+/HER2- breast cancer by period of diagnosis (N (%)) .....                                                                                                                 | 10 |
| <b>Supplementary Figure 3.</b> Overall survival (A) and relative survival (B) of all patients diagnosed with and surgically treated for non-metastatic invasive HR+/HER2- breast cancer from date of diagnosis, per 3-year incidence period .....                          | 11 |
| <b>Supplementary Table 5.</b> Univariable and multivariable analyses of overall survival in all patients diagnosed with HR+/HER2- breast cancer .....                                                                                                                      | 12 |
| <b>Supplementary Table 6.</b> Univariable and multivariable analyses of relative survival in all patients diagnosed with HR+/HER2- breast cancer .....                                                                                                                     | 13 |
| <b>Supplementary Figure 4.</b> Overall survival (A) and relative survival (B) of patients diagnosed with high-risk HR+/HER2- breast cancer from date of diagnosis, per 3-year incidence period .....                                                                       | 14 |
| <b>Supplementary Table 7.</b> Univariable and multivariable analyses of overall survival in patients diagnosed with high-risk HR+/HER2- breast cancer .....                                                                                                                | 15 |
| <b>Supplementary Table 8.</b> Univariable and multivariable analyses of relative survival in patients diagnosed with high-risk HR+/HER2- breast cancer .....                                                                                                               | 16 |

**Supplementary Table 1. Risk classification**

| Histological grade | Tumour size <sup>a</sup> | Node-negative         | 1-3 positive lymph nodes <sup>b</sup> | ≥4 positive lymph nodes <sup>b</sup> |
|--------------------|--------------------------|-----------------------|---------------------------------------|--------------------------------------|
| Grade 1            | ≤2 cm                    | Low-risk              | Low-risk                              | High-risk                            |
|                    | 2.1 – 3 cm               | Low-risk <sup>c</sup> | Intermediate-risk                     | High-risk                            |
|                    | 3.1 – 4.9 cm             | Intermediate-risk     | Intermediate-risk                     | High-risk                            |
|                    | ≥5 cm                    | Intermediate-risk     | High-risk                             | High-risk                            |
|                    | Unknown                  | Unknown-risk          | Unknown-risk                          | High-risk                            |
| Grade 2            | ≤2 cm                    | Low-risk <sup>c</sup> | Intermediate-risk                     | High-risk                            |
|                    | 2.1 – 4.9 cm             | Intermediate-risk     | Intermediate-risk                     | High-risk                            |
|                    | ≥5 cm                    | Intermediate-risk     | High-risk                             | High-risk                            |
|                    | Unknown                  | Unknown-risk          | Unknown-risk                          | High-risk                            |
| Grade 3            | ≤1 cm                    | Low-risk              | High-risk                             | High-risk                            |
|                    | 1.1 – 2 cm               | Intermediate-risk     | High-risk                             | High-risk                            |
|                    | 2.1 – 4.9 cm             | Intermediate-risk     | High-risk                             | High-risk                            |
|                    | ≥5 cm                    | Intermediate-risk     | High-risk                             | High-risk                            |
|                    | Unknown                  | Unknown-risk          | High-risk                             | High-risk                            |
| Unknown            | ≤2 cm                    | Unknown-risk          | Unknown-risk                          | High-risk                            |
|                    | 2.1 - 4.9 cm             | Unknown-risk          | Unknown-risk                          | High-risk                            |
|                    | ≥5 cm                    | Unknown-risk          | High-risk                             | High-risk                            |
|                    | Unknown                  | Unknown-risk          | Unknown-risk                          | High-risk                            |

<sup>a</sup>The pathological tumour size was used when available. In patients with unknown pathological tumour size as well as patients who received neoadjuvant systemic therapy, the clinical tumour size was used when more advanced than the pathological tumour size.

<sup>b</sup>Tumours were considered node-positive based on either the clinical or pathological nodal status. The number of positive lymph nodes was based on the pathological nodal status. In clinically node-positive patients who received neoadjuvant systemic therapy, the positivity of one to three lymph nodes was assumed when more advanced than the pathological nodal status.

<sup>c</sup>In patients aged younger than 35 years, node-negative tumours were considered intermediate-risk when having the following features:

- Grade 1 tumour of more than 2 cm in size;
- Grade 2 tumour of more than 1 cm in size.

**Supplementary Figure 1. Flowchart of included patients**

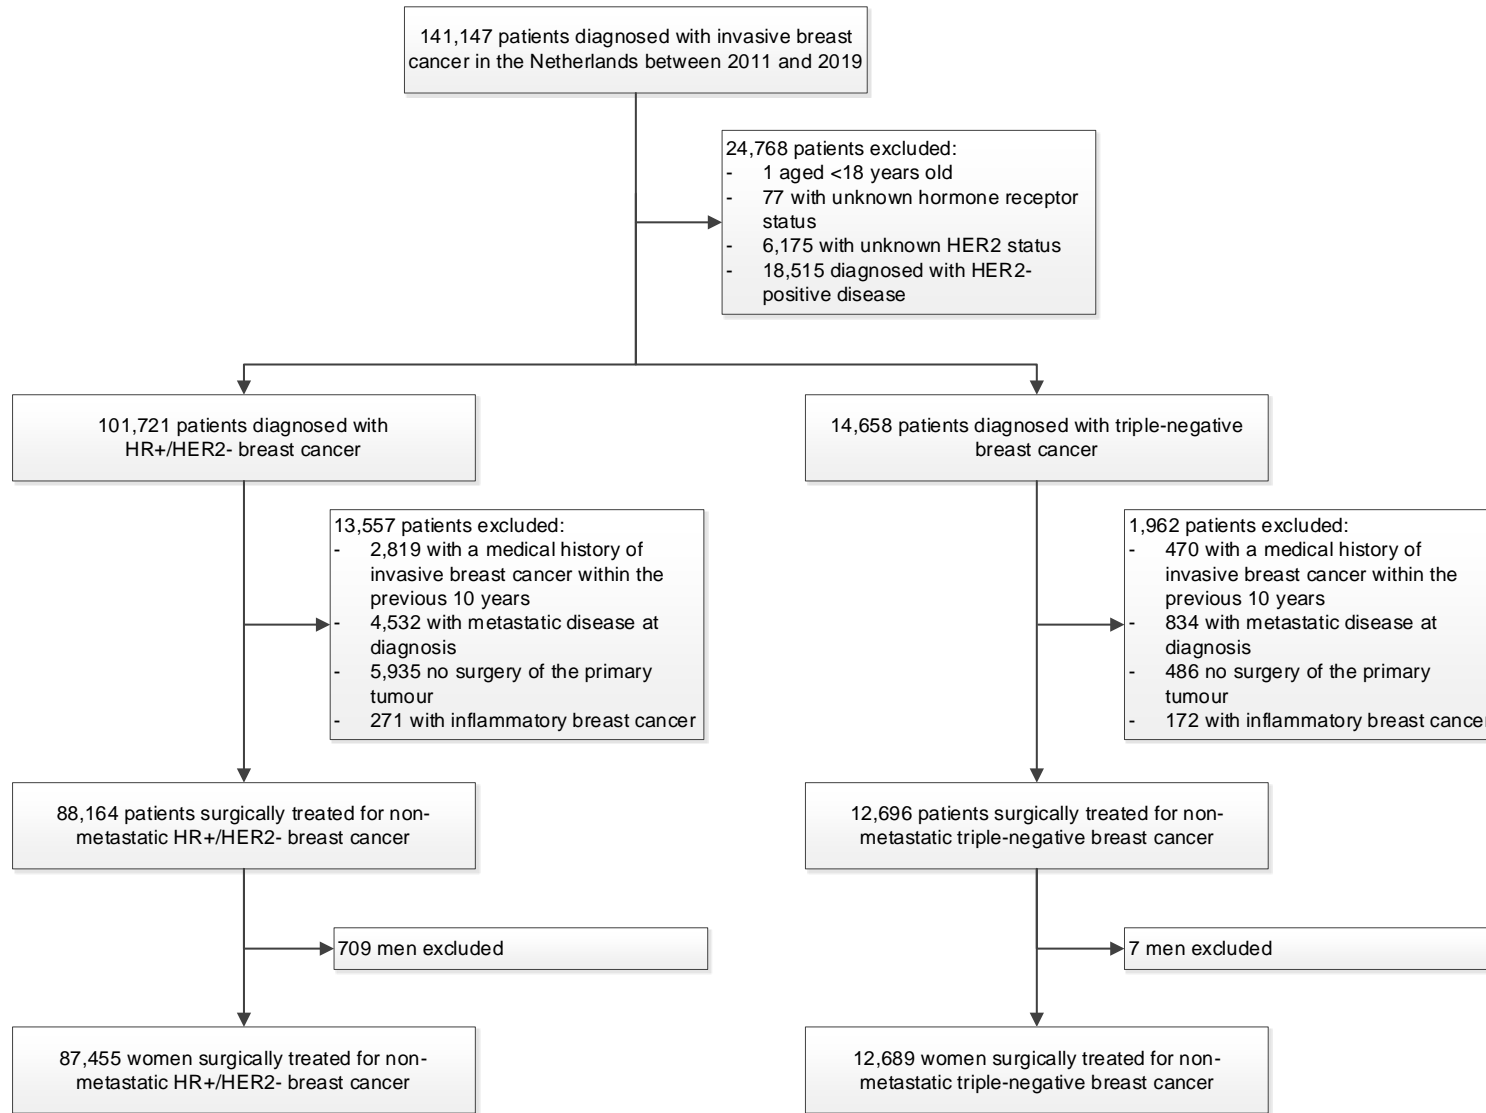

**Supplementary Table 2.** Baseline characteristics of patients diagnosed with and surgically treated for non-metastatic invasive HR+/HER2- breast cancer in the Netherlands between 2011 and 2019 by period of diagnosis (N (%))

|                           | <b>2011 – 2013<br/>(n = 28,464)</b> | <b>2014 – 2016<br/>(n = 29,190)</b> | <b>2017 – 2019<br/>(n = 29,801)</b> | <b>P for trend</b> |
|---------------------------|-------------------------------------|-------------------------------------|-------------------------------------|--------------------|
| Median age, years (range) | 61 (21-97)                          | 62 (20-101)                         | 62 (21-101)                         | <0.001             |
| Age at diagnosis          |                                     |                                     |                                     | 0.08               |
| <40 years                 | 854 (3)                             | 978 (3)                             | 1,019 (3)                           |                    |
| 40 – 49 years             | 4,659 (16)                          | 4,234 (15)                          | 4,348 (15)                          |                    |
| 50 – 75 years             | 19,934 (70)                         | 21,030 (72)                         | 21,294 (72)                         |                    |
| >75 years                 | 3,017 (11)                          | 2,948 (10)                          | 3,140 (11)                          |                    |
| Tumour size               |                                     |                                     |                                     | <0.001             |
| ≤2 cm                     | 18,534 (65)                         | 18,943 (65)                         | 18,966 (64)                         |                    |
| 2.1-4.9 cm                | 8,398 (30)                          | 8,487 (29)                          | 8,925 (30)                          |                    |
| ≥5 cm                     | 1,480 (5)                           | 1,738 (6)                           | 1,892 (6)                           |                    |
| Unknown                   | 52                                  | 22                                  | 18                                  |                    |
| Lymph nodes               |                                     |                                     |                                     | <0.001             |
| Negative                  | 18,400 (65)                         | 19,359 (66)                         | 20,280 (68)                         |                    |
| 1-3 positive              | 7,863 (28)                          | 8,353 (29)                          | 8,338 (28)                          |                    |
| 4-9 positive              | 1,453 (5)                           | 988 (3)                             | 794 (3)                             |                    |
| ≥10 positive              | 731 (3)                             | 485 (2)                             | 380 (1)                             |                    |
| Unknown                   | 17                                  | 5                                   | 9                                   |                    |
| TNM stage <sup>a</sup>    |                                     |                                     |                                     | <0.001             |
| Stage I                   | 15,474 (54)                         | 16,231 (56)                         | 16,449 (55)                         |                    |
| Stage II                  | 9,997 (35)                          | 10,375 (36)                         | 10,889 (37)                         |                    |
| Stage III                 | 2,974 (10)                          | 2,575 (9)                           | 2,455 (8)                           |                    |
| Unknown                   | 19                                  | 9                                   | 8                                   |                    |
| Histological grade        |                                     |                                     |                                     | <0.001             |
| Grade 1                   | 8,106 (31)                          | 8,399 (31)                          | 8,793 (30)                          |                    |
| Grade 2                   | 13,348 (51)                         | 14,865 (54)                         | 16,180 (55)                         |                    |
| Grade 3                   | 4,614 (18)                          | 4,267 (16)                          | 4,228(15)                           |                    |
| Unknown                   | 2,396                               | 1,659                               | 600                                 |                    |
| Hormone receptor status   |                                     |                                     |                                     | 0.36               |
| ER+/PR+                   | 23,396 (82)                         | 24,203 (83)                         | 24,661 (83)                         |                    |
| ER+/PR-                   | 4,900 (17)                          | 4,822 (17)                          | 4,997 (17)                          |                    |
| ER-/PR+                   | 110 (<1)                            | 157 (1)                             | 138 (1)                             |                    |
| Unknown ER or PR status   | 58                                  | 8                                   | 5                                   |                    |
| Histology                 |                                     |                                     |                                     | <0.001             |
| Ductal                    | 22,007 (77)                         | 22,258 (76)                         | 22,570 (76)                         |                    |
| Lobular                   | 4,878 (17)                          | 5,309 (18)                          | 5,672 (19)                          |                    |
| Other                     | 1,579 (6)                           | 1,623 (6)                           | 1,559 (5)                           |                    |
| Axillary staging          |                                     |                                     |                                     |                    |
| SNP                       | 24,428 (86)                         | 25,828 (89)                         | 26,363 (89)                         | <0.001             |
| MARI                      | 0 (0)                               | 505 (2)                             | 1,671 (6)                           | <0.001             |
| ALND                      | 7,326 (26)                          | 3,847 (13)                          | 2,665 (9)                           | <0.001             |
| None                      | 554 (2)                             | 782 (3)                             | 1,178 (4)                           | <0.001             |
| Breast-conserving surgery |                                     |                                     |                                     | <0.001             |
| Yes                       | 17,295 (61)                         | 18,856 (65)                         | 20,444 (69)                         |                    |
| Radiotherapy              |                                     |                                     |                                     | <0.001             |
| Yes                       | 20,181 (71)                         | 22,084 (76)                         | 22,445 (75)                         |                    |
| Endocrine therapy         |                                     |                                     |                                     | <0.001             |
| Yes                       | 18,929 (67)                         | 18,708 (64)                         | 17,802 (60)                         |                    |

|              |             |            |            |        |
|--------------|-------------|------------|------------|--------|
| Chemotherapy |             |            |            | <0.001 |
| Yes          | 10,371 (36) | 9,207 (32) | 7,159 (24) |        |

Abbreviations: ALND = axillary lymph node dissection; ER = oestrogen receptor; MARI = marking axillary lymph nodes with radioactive iodine <sup>125</sup>I seeds; PR = progesterone receptor; SNP = sentinel node procedure; TNM = tumour node metastasis.

Percentages may not add up to 100% because of rounding.

<sup>a</sup>Tumours were categorised according to the TNM classification of malignant tumours which was valid at the time of diagnosis, since only minor differences were present between the 7<sup>th</sup> or 8<sup>th</sup> edition. The pathological TNM stage was used when available. In patients with unknown pathological TNM stage as well as patients who received neoadjuvant systemic therapy, the clinical TNM stage was used.

**Supplementary Figure 2.** Number and proportion of patients diagnosed with and surgically treated for non-metastatic invasive HR+/HER2-breast cancer in the Netherlands between 2011 and 2019 according to risk profile, total and per 3-year incidence period

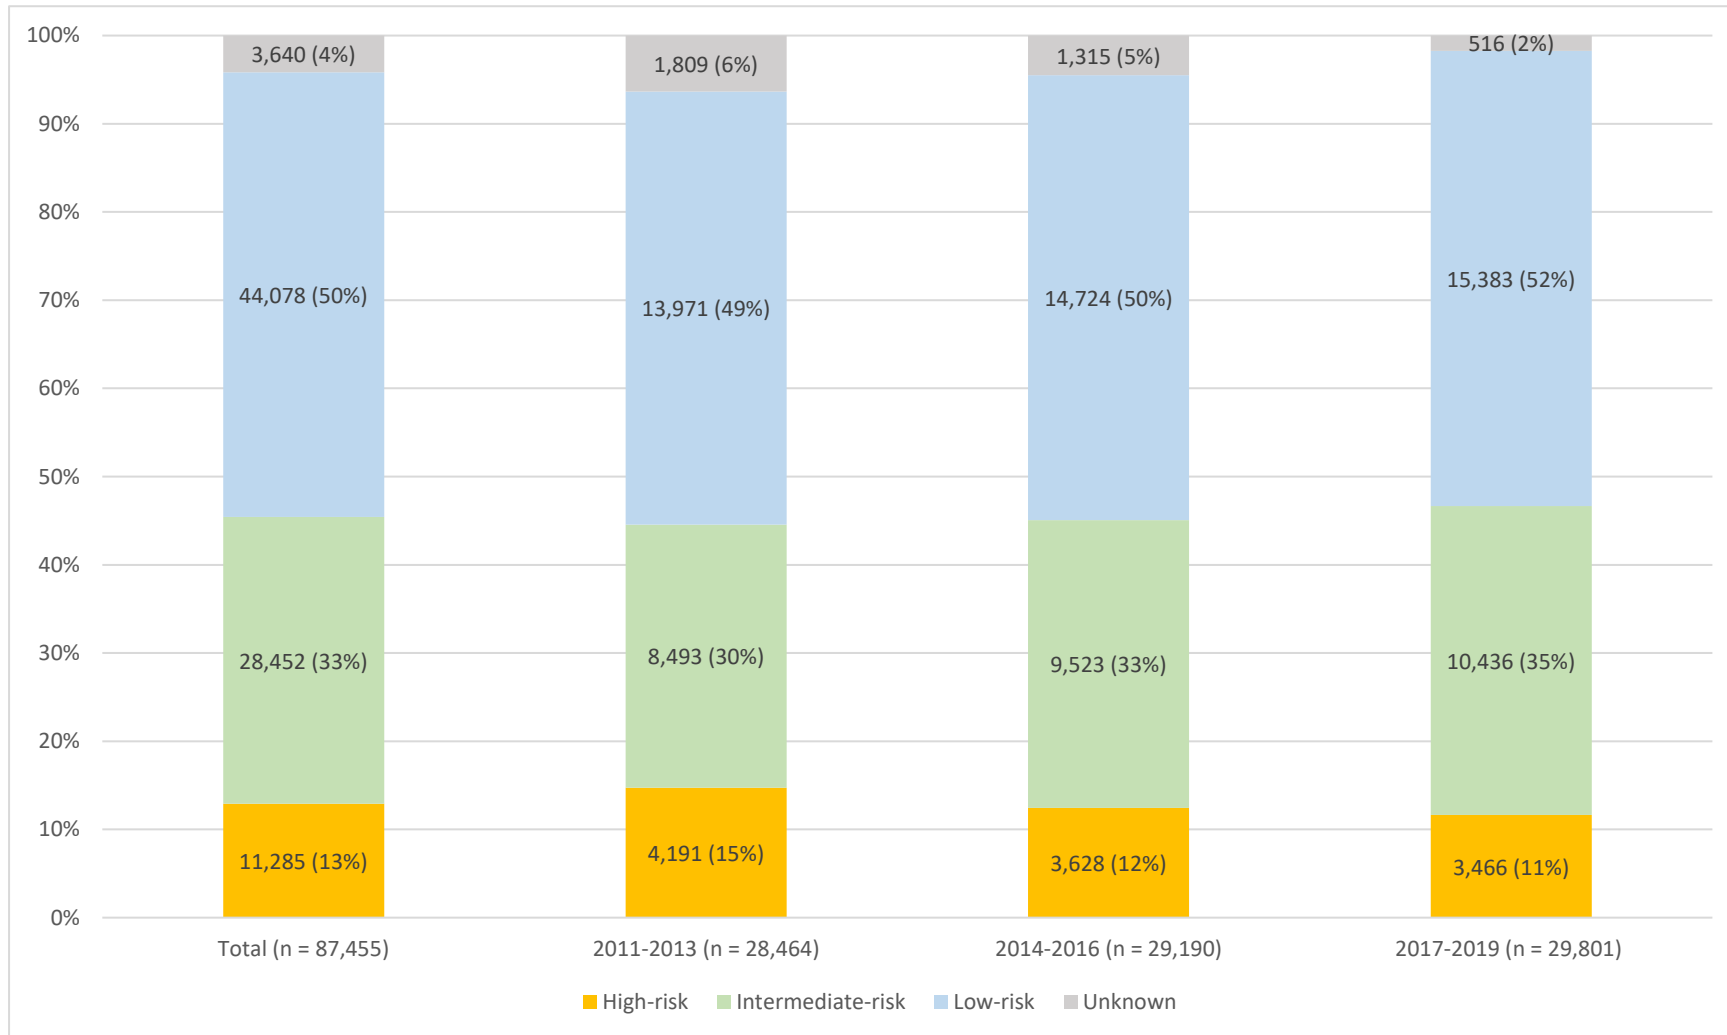

**Supplementary Table 3.** Baseline characteristics of patients diagnosed with high-risk HR+/HER2- breast cancer by period of diagnosis (N (%))

|                                                                                                                                                                                                                                                             | 2011-2013<br>(n = 4,191) | 2014-2016<br>(n = 3,628) | 2017-2019<br>(n = 3,466) | P for trend |
|-------------------------------------------------------------------------------------------------------------------------------------------------------------------------------------------------------------------------------------------------------------|--------------------------|--------------------------|--------------------------|-------------|
| Median age, years (range)                                                                                                                                                                                                                                   | 58 (24-94)               | 57 (20-95)               | 58 (23-92)               | 0.46        |
| Age at diagnosis                                                                                                                                                                                                                                            |                          |                          |                          | 0.67        |
| <40 years                                                                                                                                                                                                                                                   | 247 (6)                  | 249 (7)                  | 238 (7)                  |             |
| 40 – 49 years                                                                                                                                                                                                                                               | 1,002 (24)               | 831 (23)                 | 785 (23)                 |             |
| 50 – 75 years                                                                                                                                                                                                                                               | 2,386 (57)               | 2,107 (58)               | 1,981 (57)               |             |
| >75 years                                                                                                                                                                                                                                                   | 556 (13)                 | 441 (12)                 | 462 (13)                 |             |
| Tumour size                                                                                                                                                                                                                                                 |                          |                          |                          | <0.001      |
| ≤2 cm                                                                                                                                                                                                                                                       | 1,130 (27)               | 832 (23)                 | 728 (21)                 |             |
| 2.1-4.9 cm                                                                                                                                                                                                                                                  | 1,907 (46)               | 1,514 (42)               | 1,354 (39)               |             |
| ≥5 cm                                                                                                                                                                                                                                                       | 1,138 (27)               | 1,274 (35)               | 1,380 (40)               |             |
| Unknown                                                                                                                                                                                                                                                     | 16                       | 8                        | 4                        |             |
| Lymph nodes                                                                                                                                                                                                                                                 |                          |                          |                          | <0.001      |
| Negative                                                                                                                                                                                                                                                    | 0 (0)                    | 0 (0)                    | 0 (0)                    |             |
| 1-3 positive                                                                                                                                                                                                                                                | 2,007 (48)               | 2,155 (59)               | 2,292 (66)               |             |
| 4-9 positive                                                                                                                                                                                                                                                | 1,453 (35)               | 988 (27)                 | 794 (23)                 |             |
| ≥10 positive                                                                                                                                                                                                                                                | 731 (17)                 | 485 (13)                 | 380 (11)                 |             |
| TNM stage <sup>a</sup>                                                                                                                                                                                                                                      |                          |                          |                          | 0.003       |
| Stage I                                                                                                                                                                                                                                                     | 181 (4)                  | 178 (5)                  | 153 (4)                  |             |
| Stage II                                                                                                                                                                                                                                                    | 1,228 (29)               | 1,158 (32)               | 1,142 (33)               |             |
| Stage III                                                                                                                                                                                                                                                   | 2,782 (66)               | 2,292 (63)               | 2,171 (63)               |             |
| Histological grade                                                                                                                                                                                                                                          |                          |                          |                          | <0.001      |
| Grade 1                                                                                                                                                                                                                                                     | 240 (7)                  | 279 (9)                  | 259 (8)                  |             |
| Grade 2                                                                                                                                                                                                                                                     | 1,297 (36)               | 1,253 (38)               | 1,401 (42)               |             |
| Grade 3                                                                                                                                                                                                                                                     | 2,040 (57)               | 1,742 (53)               | 1,704 (51)               |             |
| Unknown                                                                                                                                                                                                                                                     | 614                      | 354                      | 102                      |             |
| Hormone receptor status                                                                                                                                                                                                                                     |                          |                          |                          | 0.47        |
| ER+/PR+                                                                                                                                                                                                                                                     | 3,284 (79)               | 2,851 (79)               | 2,751 (79)               |             |
| ER+/PR-                                                                                                                                                                                                                                                     | 868 (21)                 | 732 (20)                 | 692 (20)                 |             |
| ER-/PR+                                                                                                                                                                                                                                                     | 26 (1)                   | 45 (1)                   | 22 (1)                   |             |
| Unknown ER or PR status                                                                                                                                                                                                                                     | 13                       | 0                        | 1                        |             |
| Histology                                                                                                                                                                                                                                                   |                          |                          |                          | <0.001      |
| Ductal                                                                                                                                                                                                                                                      | 3,144 (75)               | 2,652 (73)               | 2,480 (72)               |             |
| Lobular                                                                                                                                                                                                                                                     | 942 (23)                 | 879 (24)                 | 884 (26)                 |             |
| Other                                                                                                                                                                                                                                                       | 105 (3)                  | 97 (3)                   | 102 (3)                  |             |
| Axillary staging                                                                                                                                                                                                                                            |                          |                          |                          |             |
| SNP                                                                                                                                                                                                                                                         | 2,112 (50)               | 1,961 (54)               | 2,095 (60)               | <0.001      |
| MARI                                                                                                                                                                                                                                                        | 0 (0)                    | 228 (6)                  | 776 (22)                 | <0.001      |
| ALND                                                                                                                                                                                                                                                        | 3,429 (82)               | 2,113 (58)               | 1,574 (45)               | <0.001      |
| None                                                                                                                                                                                                                                                        | 48 (1)                   | 85 (2)                   | 44 (1)                   | 0.50        |
| Breast-conserving surgery                                                                                                                                                                                                                                   |                          |                          |                          | 0.002       |
| Yes                                                                                                                                                                                                                                                         | 1,337 (32)               | 1,210 (33)               | 1,224 (35)               |             |
| Radiotherapy                                                                                                                                                                                                                                                |                          |                          |                          | <0.001      |
| Yes                                                                                                                                                                                                                                                         | 3,413 (81)               | 3,196 (88)               | 3,098 (89)               |             |
| Abbreviations: ALND = axillary lymph node dissection; ER = oestrogen receptor; MARI = marking axillary lymph nodes with radioactive iodine <sup>125</sup> I seeds; PR = progesterone receptor; SNP = sentinel node procedure; TNM = tumour node metastasis. |                          |                          |                          |             |



Percentages may not add up to 100% because of rounding.

<sup>a</sup>Tumours were categorised according to the TNM classification of malignant tumours which was valid at the time of diagnosis, since only minor differences were present between the 7<sup>th</sup> or 8<sup>th</sup> edition. The pathological TNM stage was used when available. In patients with unknown pathological TNM stage as well as patients who received neoadjuvant systemic therapy, the clinical TNM stage was used.

**Supplementary Table 4.** Systemic treatment choices in patients diagnosed with high-risk HR+/HER2- breast cancer by period of diagnosis (N (%))

| <b>Systemic treatment</b>          | <b>2011 – 2013<br/>(n = 4,191)</b> | <b>2014 – 2016<br/>(n = 3,628)</b> | <b>2017 – 2019<br/>(n = 3,466)</b> | <b>P for trend</b> |
|------------------------------------|------------------------------------|------------------------------------|------------------------------------|--------------------|
| Endocrine therapy                  | 3,947 (94)                         | 3,423 (94)                         | 3,214 (93)                         | 0.01               |
| Neoadjuvant                        | 111 (3)                            | 174 (5)                            | 314 (9)                            | <0.001             |
| Adjuvant                           | 3,945 (94)                         | 3,419 (94)                         | 3,204 (92)                         | 0.004              |
| Chemotherapy                       | 3,106 (74)                         | 2,677 (74)                         | 2,439 (70)                         | <0.001             |
| Neoadjuvant                        | 828 (20)                           | 1,258 (35)                         | 1,458 (42)                         | <0.001             |
| Adjuvant                           | 2,346 (56)                         | 1,469 (41)                         | 1,170 (34)                         | <0.001             |
| Endocrine therapy and chemotherapy | 2,969 (71)                         | 2,547 (70)                         | 2,296 (66)                         | <0.001             |
| No systemic therapy                | 107 (3)                            | 75 (2)                             | 109 (3)                            | 0.13               |

**Supplementary Figure 3.** Overall survival (A) and relative survival (B) of all patients diagnosed with and surgically treated for non-metastatic invasive HR+/HER2- breast cancer from date of diagnosis, per 3-year incidence period

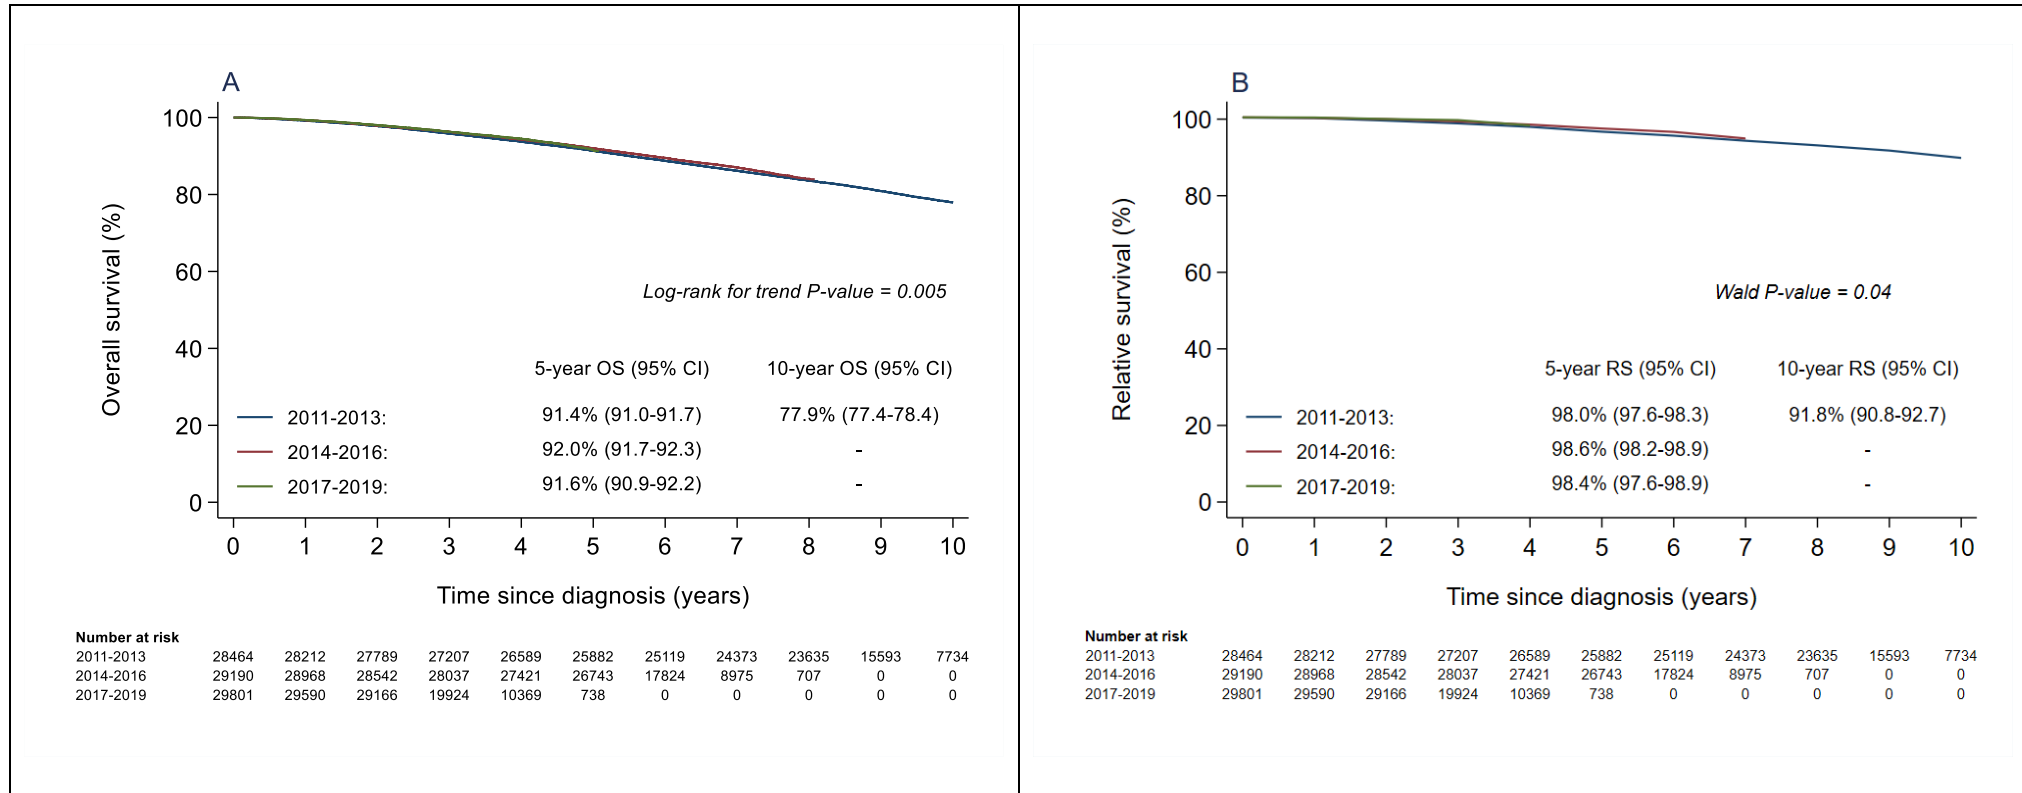

**Supplementary Table 5.** Univariable and multivariable analyses of overall survival in all patients diagnosed with HR+/HER2- breast cancer

|                                                                                              | Univariable analyses |         | Multivariable analyses |         |
|----------------------------------------------------------------------------------------------|----------------------|---------|------------------------|---------|
|                                                                                              | HR (95% CI)          | P-value | HR (95% CI)            | P-value |
| Period of diagnosis                                                                          |                      |         |                        |         |
| 2014 – 2016 vs 2011 – 2013                                                                   | 0.95 (0.90 – 0.99)   | 0.01    | 0.95 (0.91 – 1.00)     | 0.03    |
| 2017 – 2019 vs 2011 – 2013                                                                   | 0.93 (0.87 – 0.99)   | 0.02    | 0.90 (0.84 – 0.96)     | 0.001   |
| Age                                                                                          |                      |         |                        |         |
| ≥60 years vs <60 years                                                                       | 3.12 (2.98 – 3.27)   | <0.001  | 2.56 (2.44 – 2.69)     | <0.001  |
| Tumour size                                                                                  |                      |         |                        |         |
| 2.1 – 4.9 cm vs ≤2 cm                                                                        | 2.09 (2.00 – 2.17)   | <0.001  | 2.19 (2.09 – 2.29)     | <0.001  |
| ≥5 cm vs ≤2 cm                                                                               | 2.72 (2.54 – 2.90)   | <0.001  | 2.92 (2.70 – 3.15)     | <0.001  |
| Number of lymph nodes                                                                        |                      |         |                        |         |
| 1 – 3 nodes vs no nodes                                                                      | 1.36 (1.30 – 1.41)   | <0.001  | 1.60 (1.52 – 1.67)     | <0.001  |
| 4 – 9 nodes vs no nodes                                                                      | 2.57 (2.39 – 2.75)   | <0.001  | 2.77 (2.56 – 2.99)     | <0.001  |
| ≥10 nodes vs no nodes                                                                        | 4.54 (4.19 – 4.91)   | <0.001  | 4.41 (4.04 – 4.81)     | <0.001  |
| Histological grade                                                                           |                      |         |                        |         |
| Grade 2 vs grade 1                                                                           | 1.38 (1.32 – 1.45)   | <0.001  | 1.35 (1.29 – 1.42)     | <0.001  |
| Grade 3 vs grade 1                                                                           | 2.06 (1.95 – 2.17)   | <0.001  | 2.00 (1.88 – 2.13)     | <0.001  |
| Hormone receptor status                                                                      |                      |         |                        |         |
| Single HR+ vs double HR+                                                                     | 1.44 (1.38 – 1.51)   | <0.001  | 1.27 (1.21 – 1.33)     | <0.001  |
| Histology                                                                                    |                      |         |                        |         |
| (Mixed) lobular vs ductal                                                                    | 1.14 (1.08 – 1.19)   | <0.001  | 0.89 (0.84 – 0.93)     | <0.001  |
| Other vs ductal                                                                              | 1.19 (1.10 – 1.28)   | <0.001  | 1.17 (1.08 – 1.27)     | <0.001  |
| Chemotherapy                                                                                 |                      |         |                        |         |
| Yes vs no                                                                                    | 0.64 (0.61 – 0.67)   | <0.001  | 0.46 (0.43 – 0.48)     | <0.001  |
| Endocrine therapy                                                                            |                      |         |                        |         |
| Yes vs no                                                                                    | 1.23 (1.18 – 1.28)   | <0.001  | 0.76 (0.72 – 0.80)     | <0.001  |
| Abbreviations: CI = confidence interval; HR = hazard ratio; HR+ = hormone receptor-positive. |                      |         |                        |         |

**Supplementary Table 6.** Univariable and multivariable analyses of relative survival in all patients diagnosed with HR+/HER2- breast cancer

|                                                                                              | Univariable analyses  |         | Multivariable analyses |         |
|----------------------------------------------------------------------------------------------|-----------------------|---------|------------------------|---------|
|                                                                                              | HR (95% CI)           | P-value | HR (95% CI)            | P-value |
| <b>Period of diagnosis</b>                                                                   |                       |         |                        |         |
| 2014 – 2016 vs 2011 – 2013                                                                   | 0.90 (0.80 – 1.01)    | 0.06    | 0.96 (0.87 – 1.06)     | 0.39    |
| 2017 – 2019 vs 2011 – 2013                                                                   | 0.83 (0.68 – 1.01)    | 0.06    | 0.94 (0.80 – 1.09)     | 0.40    |
| <b>Age</b>                                                                                   |                       |         |                        |         |
| ≥60 years vs <60 years                                                                       | 0.83 (0.73 – 0.93)    | 0.002   | 1.02 (0.92 – 1.13)     | 0.72    |
| <b>Tumour size</b>                                                                           |                       |         |                        |         |
| 2.1 – 4.9 cm vs ≤2 cm                                                                        | 4.44 (3.88 – 5.07)    | <0.001  | 2.80 (2.46 – 3.20)     | <0.001  |
| ≥5 cm vs ≤2 cm                                                                               | 9.40 (8.11 – 10.91)   | <0.001  | 4.26 (3.65 – 4.98)     | <0.001  |
| <b>Number of lymph nodes</b>                                                                 |                       |         |                        |         |
| 1 – 3 nodes vs no nodes                                                                      | 3.55 (3.07 – 4.09)    | <0.001  | 2.93 (2.56 – 3.36)     | <0.001  |
| 4 – 9 nodes vs no nodes                                                                      | 10.53 (8.99 – 12.34)  | <0.001  | 6.31 (5.38 – 7.42)     | <0.001  |
| ≥10 nodes vs no nodes                                                                        | 21.90 (18.68 – 25.69) | <0.001  | 12.01 (10.22 – 14.11)  | <0.001  |
| <b>Histological grade</b>                                                                    |                       |         |                        |         |
| Grade 2 vs grade 1                                                                           | 3.48 (2.72 – 4.46)    | <0.001  | 2.29 (1.89 – 2.79)     | <0.001  |
| Grade 3 vs grade 1                                                                           | 8.22 (6.41 – 10.53)   | <0.001  | 4.16 (3.40 – 5.08)     | <0.001  |
| <b>Hormone receptor status</b>                                                               |                       |         |                        |         |
| Single HR+ vs double HR+                                                                     | 2.23 (2.02 – 2.47)    | <0.001  | 2.02 (1.84 – 2.21)     | <0.001  |
| <b>Histology</b>                                                                             |                       |         |                        |         |
| (Mixed) lobular vs ductal                                                                    | 1.17 (1.04 – 1.33)    | 0.01    | 0.92 (0.82 – 1.03)     | 0.14    |
| Other vs ductal                                                                              | 0.58 (0.41 – 0.81)    | 0.001   | 0.87 (0.66 – 1.14)     | 0.30    |
| <b>Chemotherapy</b>                                                                          |                       |         |                        |         |
| Yes vs no                                                                                    | 3.26 (2.84 – 3.74)    | <0.001  | 0.55 (0.49 – 0.61)     | <0.001  |
| <b>Endocrine therapy</b>                                                                     |                       |         |                        |         |
| Yes vs no                                                                                    | 3.10 (2.60 – 3.68)    | <0.001  | 0.69 (0.60 – 0.80)     | <0.001  |
| Abbreviations: CI = confidence interval; HR = hazard ratio; HR+ = hormone receptor-positive. |                       |         |                        |         |

**Supplementary Figure 4.** Overall survival (A) and relative survival (B) of patients diagnosed with high-risk HR+/HER2- breast cancer from date of diagnosis, per 3-year incidence period

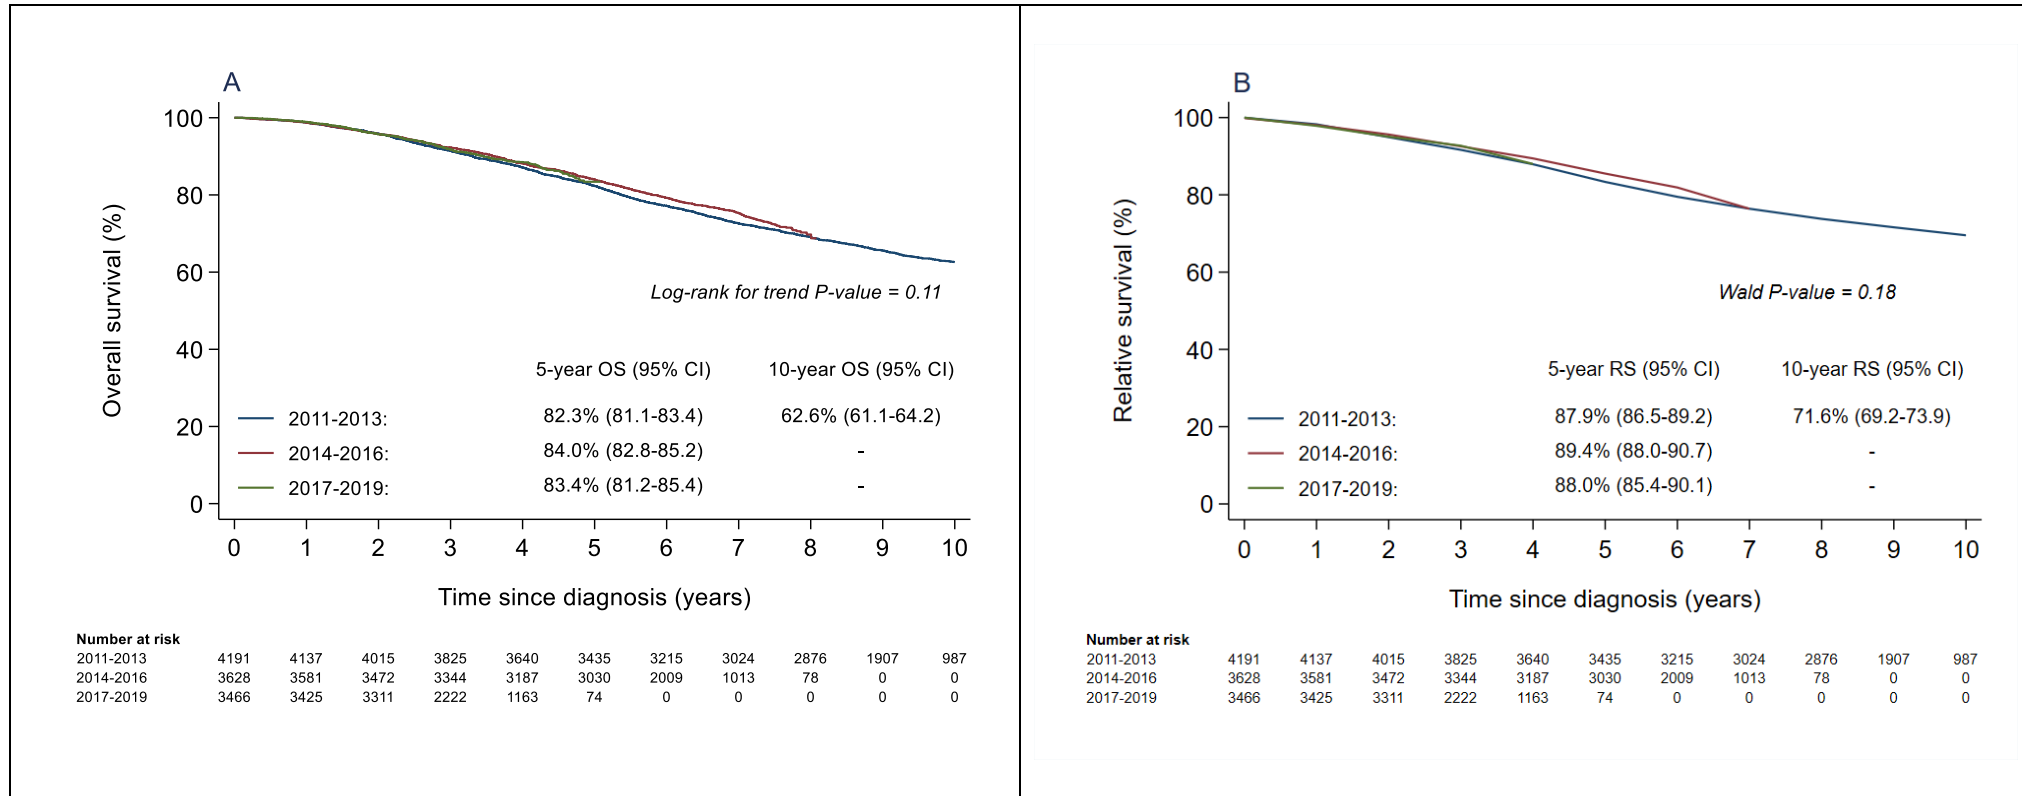

**Supplementary Table 7.** Univariable and multivariable analyses of overall survival in patients diagnosed with high-risk HR+/HER2- breast cancer

|                                                                                              | Univariable analyses |         | Multivariable analyses |         |
|----------------------------------------------------------------------------------------------|----------------------|---------|------------------------|---------|
|                                                                                              | HR (95% CI)          | P-value | HR (95% CI)            | P-value |
| <b>Period of diagnosis</b>                                                                   |                      |         |                        |         |
| 2014 – 2016 vs 2011 – 2013                                                                   | 0.92 (0.84 – 1.01)   | 0.07    | 0.97 (0.89 – 1.06)     | 0.48    |
| 2017 – 2019 vs 2011 – 2013                                                                   | 0.93 (0.82 – 1.07)   | 0.28    | 0.96 (0.85 – 1.09)     | 0.52    |
| <b>Age</b>                                                                                   |                      |         |                        |         |
| ≥60 years vs <60 years                                                                       | 2.63 (2.43 – 2.85)   | <0.001  | 1.55 (1.41 – 1.71)     | <0.001  |
| <b>Tumour size</b>                                                                           |                      |         |                        |         |
| 2.1 – 4.9 cm vs ≤2 cm                                                                        | 1.83 (1.65 – 2.04)   | <0.001  | 1.61 (1.45 – 1.79)     | <0.001  |
| ≥5 cm vs ≤2 cm                                                                               | 1.64 (1.47 – 1.84)   | <0.001  | 2.15 (1.91 – 2.42)     | <0.001  |
| <b>Number of lymph nodes</b>                                                                 |                      |         |                        |         |
| 4 – 9 nodes vs 1 – 3 nodes                                                                   | 1.36 (1.25 – 1.49)   | <0.001  | 1.80 (1.63 – 1.98)     | <0.001  |
| ≥10 nodes vs 1 – 3 nodes                                                                     | 2.39 (2.17 – 2.63)   | <0.001  | 2.86 (2.59 – 3.17)     | <0.001  |
| <b>Histological grade</b>                                                                    |                      |         |                        |         |
| Grade 2 vs grade 1                                                                           | 1.43 (1.21 – 1.69)   | <0.001  | 1.27 (1.08 – 1.50)     | 0.005   |
| Grade 3 vs grade 1                                                                           | 1.44 (1.22 – 1.69)   | <0.001  | 1.85 (1.56 – 2.19)     | <0.001  |
| <b>Hormone receptor status</b>                                                               |                      |         |                        |         |
| Single HR+ vs double HR+                                                                     | 1.63 (1.50 – 1.77)   | <0.001  | 1.55 (1.42 – 1.68)     | <0.001  |
| <b>Histology</b>                                                                             |                      |         |                        |         |
| (Mixed) lobular vs ductal                                                                    | 1.16 (1.06 – 1.26)   | 0.001   | 0.98 (0.89 – 1.08)     | 0.67    |
| Other vs ductal                                                                              | 1.04 (0.83 – 1.32)   | 0.72    | 0.98 (0.77 – 1.24)     | 0.86    |
| <b>Chemotherapy</b>                                                                          |                      |         |                        |         |
| Yes vs no                                                                                    | 0.31 (0.29 – 0.33)   | <0.001  | 0.38 (0.35 – 0.42)     | <0.001  |
| <b>Endocrine therapy</b>                                                                     |                      |         |                        |         |
| Yes vs no                                                                                    | 0.52 (0.46 – 0.60)   | <0.001  | 0.57 (0.50 – 0.65)     | <0.001  |
| Abbreviations: CI = confidence interval; HR = hazard ratio; HR+ = hormone receptor-positive. |                      |         |                        |         |

**Supplementary Table 8.** Univariable and multivariable analyses of relative survival in patients diagnosed with high-risk HR+/HER2- breast cancer

|                                                                                              | Univariable analyses |         | Multivariable analyses |         |
|----------------------------------------------------------------------------------------------|----------------------|---------|------------------------|---------|
|                                                                                              | HR (95% CI)          | P-value | HR (95% CI)            | P-value |
| Period of diagnosis                                                                          |                      |         |                        |         |
| 2014 – 2016 vs 2011 – 2013                                                                   | 0.90 (0.79 – 1.03)   | 0.12    | 0.95 (0.84 – 1.08)     | 0.45    |
| 2017 – 2019 vs 2011 – 2013                                                                   | 0.95 (0.78 – 1.16)   | 0.63    | 1.02 (0.85 – 1.21)     | 0.86    |
| Age                                                                                          |                      |         |                        |         |
| ≥60 years vs <60 years                                                                       | 1.52 (1.36 – 1.70)   | <0.001  | 1.09 (0.96 – 1.23)     | 0.20    |
| Tumour size                                                                                  |                      |         |                        |         |
| 2.1 – 4.9 cm vs ≤2 cm                                                                        | 2.05 (1.72 – 2.44)   | <0.001  | 1.80 (1.53 – 2.12)     | <0.001  |
| ≥5 cm vs ≤2 cm                                                                               | 2.12 (1.78 – 2.54)   | <0.001  | 2.64 (2.22 – 3.14)     | <0.001  |
| Number of lymph nodes                                                                        |                      |         |                        |         |
| 4 – 9 nodes vs 1 – 3 nodes                                                                   | 1.55 (1.35 – 1.77)   | <0.001  | 2.04 (1.78 – 2.34)     | <0.001  |
| ≥10 nodes vs 1 – 3 nodes                                                                     | 3.21 (2.81 – 3.68)   | <0.001  | 3.78 (3.31 – 4.33)     | <0.001  |
| Histological grade                                                                           |                      |         |                        |         |
| Grade 2 vs grade 1                                                                           | 1.74 (1.32 – 2.31)   | <0.001  | 1.48 (1.15 – 1.90)     | 0.003   |
| Grade 3 vs grade 1                                                                           | 1.72 (1.30 – 2.27)   | <0.001  | 2.27 (1.76 – 2.93)     | <0.001  |
| Hormone receptor status                                                                      |                      |         |                        |         |
| Single HR+ vs double HR+                                                                     | 2.03 (1.80 – 2.28)   | <0.001  | 1.91 (1.70 – 2.13)     | <0.001  |
| Histology                                                                                    |                      |         |                        |         |
| (Mixed) lobular vs ductal                                                                    | 1.18 (1.03 – 1.34)   | 0.02    | 0.97 (0.85 – 1.11)     | 0.68    |
| Other vs ductal                                                                              | 0.98 (0.68 – 1.41)   | 0.91    | 0.92 (0.65 – 1.29)     | 0.62    |
| Chemotherapy                                                                                 |                      |         |                        |         |
| Yes vs no                                                                                    | 0.48 (0.43 – 0.54)   | <0.001  | 0.47 (0.41 – 0.54)     | <0.001  |
| Endocrine therapy                                                                            |                      |         |                        |         |
| Yes vs no                                                                                    | 0.54 (0.44 – 0.66)   | <0.001  | 0.56 (0.47 – 0.68)     | <0.001  |
| Abbreviations: CI = confidence interval; HR = hazard ratio; HR+ = hormone receptor-positive. |                      |         |                        |         |
